# Supplementary material
Source: Springer Nature journal article supplement (https://www.springermedizin.de/resource/supplementary/12943_2006_175_MOESM3_ESM.pdf/9553606)

Normal Epithelium

Primary CRC

Metastatic CRC

Blood/lymph  
vessels

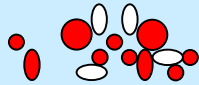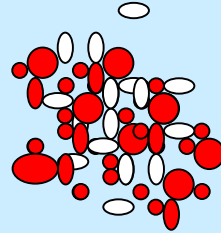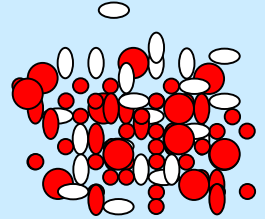

Stromal  
factors

VEGF  
VEGFR  
TII

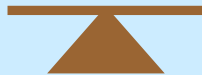

VEGF↑  
VEGFR↑  
MVD  
MMP  
PINCH

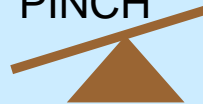

VEGF↑↑  
VEGFR↑↑  
MVD↑  
MMP  
PINCH↑

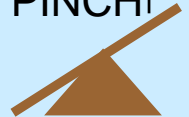

Supplement: MOESM3 [file 9553606]
